# Supplementary material for: Age-related effects on dynamic postural stability and prefrontal cortex activation during precision fitting tasks
Source: PeerJ. 2025 Jan 29;13:e18548. doi: 10.7717/peerj.18548 (PMC11786713; doi:10.7717/peerj.18548)
Supplement: Data S1 [file peerj-13-18548-s001.xlsx]

## Sheet: Dynamic postural stability
	Close-large						Close-small						Far-large						Far-small
	SD_AP	SD_ML	V_AP(mm/s)	V_ML(mm/s)	SA (mm2)		SD_AP	SD_ML	V_AP(mm/s)	V_ML(mm/s)	SA (mm2)		SD_AP	SD_ML	V_AP(mm/s)	V_ML(mm/s)	SA (mm2)		SD_AP	SD_ML	V_AP(mm/s)	V_ML(mm/s)	SA (mm2)
Older	49.7224	13.1716	137.682	47.3345	6111.45		31.4704	11.0924	44.175	24.4838	2732.26		45.4312	15.5075	119.808	53.8897	7430.57		39.9686	37.1293	51.1318	45.7274	10291.5
	32.1298	17.9371	78.0006	44.0876	2733.61		22.5371	6.32592	35.8057	24.4063	1846.15		45.709	16.6923	121.407	67.0266	11403.4		54.0497	16.1888	70.8362	41.2291	6555.47
	20.4978	12.6108	49.6119	37.968	2357.43		20.5092	4.83962	42.3516	28.954	1721.04		54.4497	19.1226	124.047	83.2512	12719		32.3305	13.4223	88.6381	68.7104	6525.11
	15.1885	31.9822	41.7039	56.4095	3372.32		11.1293	19.5063	24.686	27.3029	2540.39		26.4906	18.5172	69.7566	36.0407	4177.28		25.8426	19.6058	44.1892	28.6831	4418.24
	45.211	9.41922	68.576	39.3051	6806.23		26.9858	6.65211	35.7193	18.0729	2349.81		40.7757	14.4266	75.9734	42.7706	7347.82		31.5099	15.5007	43.517	25.5252	3674.11
	39.0758	20.4663	65.3671	47.2402	3802.18		29.7656	15.2782	43.3702	31.097	4341.19		37.2385	10.1814	77.7333	36.9632	4189.28		48.356	15.0093	71.4347	37.6958	7419.81
	34.744	14.8434	77.2266	37.7869	5853.73		29.7317	25.5637	22.1206	6.6347	2748.72		61.1611	13.4526	85.764	33.9938	5980.03		44.5293	5.86252	49.8645	17.5779	4073.54
	32.5203	3.98309	65.9821	18.2967	2033.72		22.3604	5.42337	34.5046	13.7137	1205.95		31.5699	8.60913	68.2403	27.6958	3451.16		29.4237	8.67265	65.6408	21.4485	2842.92
	27.6474	8.68546	59.2229	31.1206	1930.92		25.6143	3.48025	35.0076	16.3726	1511.02		35.6323	7.93375	73.7386	30.1677	3626.57		34.2492	9.27079	56.4559	29.4329	3819
	31.1462	4.68153	78.3709	31.1604	2129.59		17.1277	12.1128	59.4907	64.6988	2849.07		42.268	12.3531	107.766	43.4092	5808.66		34.2684	7.82144	56.8767	32.5788	4305.53
	44.5094	9.36822	87.9384	38.7532	6023.25		22.6594	5.19257	42.2934	18.039	1481.42		38.529	8.45306	89.2945	38.1401	5032.09		39.082	7.34951	67.303	34.6612	4939.18
	19.6715	4.02315	38.7141	17.2533	1088.34		19.682	12.5878	32.0041	20.7747	2798.08		35.5399	27.0536	78.5138	60.9482	9903.69		47.5065	47.2575	53.8651	54.9005	11843.7
	51.5978	29.3792	122.966	65.9254	8950.44		34.453	13.8402	55.9849	30.3354	4530.52		43.6344	15.9649	102.857	55.2473	11058.6		36.1733	12.7508	69.6818	37.1007	5738.28
	31.7763	19.9574	60.4053	37.026	4113.57		22.338	5.02019	33.0666	14.4035	1057.64		32.0945	21.4789	49.4957	32.8077	4565.93		39.2384	45.3289	66.1526	64.084	18661.5
	41.7412	8.81324	85.0318	24.1532	2294.98		25.4089	3.29118	35.7176	12.5488	1298.27		58.7451	8.5666	104.929	37.6614	7601.02		50.7941	11.4482	69.4688	35.5015	8773.73
Middle	18.4618	3.71252	41.6515	21.5237	679.569		14.8529	3.02615	28.4865	13.5573	636.364		31.7008	7.13503	50.3761	28.6177	2681.79		33.5949	5.11646	41.5134	23.6024	2361.91
	43.5746	9.33916	92.891	57.6231	6805.94		24.0419	7.49037	40.4313	27.6833	3116.65		31.066	9.9511	65.3279	38.7057	5128.29		40.3365	12.0777	64.265	43.2666	7898.12
	21.1208	5.39267	52.8911	21.3447	1938.11		17.5736	5.15525	36.7592	15.5398	907.42		36.0242	8.44466	70.7992	28.4178	2922.36		28.2515	4.75542	44.5317	21.0928	2109.21
	37.1132	9.39774	82.4732	30.2637	2664.13		19.4646	4.30636	33.9183	19.5377	1202.77		31.5207	11.9014	84.1786	64.8318	4459.08		24.8225	11.0341	48.4997	33.2658	3214.25
	42.0283	14.6167	95.0724	39.2715	4169.29		27.2681	5.71397	38.8983	15.8947	2541.11		38.7169	14.4753	82.5754	42.6016	4163.46		27.7542	9.10053	39.8435	18.1004	1482.07
	28.715	6.30072	64.5023	20.6072	1460.68		25.1322	5.63258	41.0237	19.0151	1724.39		47.6336	13.1514	102.144	46.354	5471.3		55.9263	9.30158	82.1229	39.2398	8861.85
	33.5626	9.98735	80.0458	29.6824	3378.53		15.5081	6.89279	30.1373	18.508	933.827		16.306	9.8681	43.9503	26.8606	1320.38		20.2819	18.2102	31.452	32.02	2795.91
	24.3307	9.32925	68.4822	32.2205	1425.67		13.4678	2.30356	27.3871	12.3027	538.95		26.6351	11.3731	70.8455	33.9339	3185.16		21.7221	9.87775	47.8529	22.9548	2669.8
	29.1472	3.57544	52.6055	12.8174	1081.27		28.1588	5.36896	34.463	13.3288	2041.4		28.9977	15.9735	55.2196	38.3287	3809.41		30.7769	12.2318	41.4677	25.0496	4783.81
	35.4443	12.664	81.9274	34.7839	2764.81		22.8103	15.8101	33.8455	23.3906	2240.94		44.6204	20.3401	72.5983	45.688	9264.73		61.5185	13.303	63.4709	31.8712	10175.5
	30.2155	13.7131	78.3691	32.3211	3500.86		23.2881	3.64466	32.0179	13.2339	1206.38		38.4612	9.3604	82.7462	42.414	5426.39		30.7835	6.96099	50.434	24.1821	3220.42
	44.2996	13.1843	136.872	59.7055	7710.42		22.7551	4.44187	45.8022	23.6684	1560.64		49.7311	10.2868	147.681	70.262	7403.52		32.1504	7.0192	76.6406	43.2288	3274.13
	36.1477	6.64282	68.877	31.2441	3840.57		17.8676	3.1071	32.0331	15.5016	884.527		46.7946	11.0163	75.8972	48.1885	7395.95		32.3568	5.01427	51.0363	24.3433	2543.54
	20.8156	10.15	35.7855	27.3695	1768.64		18.0949	12.8663	28.9239	21.2073	1642.18		25.5335	20.1334	64.0704	39.9953	4352.22		20.8614	15.38	44.4098	27.8255	2867.42
	44.0675	4.61758	79.0583	25.5019	2656.92		21.6275	3.93858	32.8252	13.5599	945.329		43.4112	10.1052	79.0824	27.7719	4423.78		43.5825	14.9508	45.6946	21.7561	3702.25
Young	12.9628	3.7146	27.9166	18.2917	640.496		13.6358	4.27042	22.4009	12.2163	555.291		29.4532	8.82038	66.5212	36.3394	3492.58		19.1212	8.10032	30.2503	19.683	1221.46
	32.9329	6.40642	62.4596	23.9831	2731.06		22.8509	5.07483	35.3191	16.9177	1600.48		28.8194	15.6381	67.4863	44.248	4007.15		28.8127	13.4758	44.1139	27.3061	3202.36
	20.4376	6.67027	64.053	40.5101	2069.65		22.3893	6.15596	48.9403	43.9136	2546.17		29.8505	13.998	97.7032	81.192	5920.44		30.3757	15.953	78.1439	57.3597	6636.21
	23.5429	5.86573	44.7639	15.2427	1168		36.2006	4.12496	53.3375	17.54	1935.66		40.0832	8.23654	69.8106	31.5749	4535.73		34.5807	5.50157	58.0394	22.4605	2367.15
	23.8664	4.64844	57.3686	21.6309	1252.52		14.3725	3.2602	36.6716	18.2594	582.044		32.2422	11.8917	114.934	52.281	3218.46		14.1066	6.18359	45.1481	20.96	1406.12
	14.7299	5.18	38.4384	27.4118	1298.49		14.675	2.74315	25.9427	15.829	734.792		25.9624	7.20543	76.979	51.2807	2765.4		15.08	4.2827	27.0705	17.8175	678.5
	23.1198	5.48113	55.506	29.6391	2347.9		18.1886	4.00759	35.2646	17.1705	1006.41		43.3236	18.3169	104.608	87.8035	10608.6		34.9651	7.66528	52.9256	28.7216	3008.03
	37.1405	10.4352	81.773	41.6651	3867.17		43.4349	6.46703	56.9976	29.9707	3193.6		58.3281	6.92989	104.896	51.3704	6391.2		59.3761	9.19914	72.2105	52.8061	8644.02
	33.0486	12.8465	77.9614	49.8728	4062.68		21.33	6.42298	35.1933	26.421	2052.4		22.4402	15.9088	59.3347	52.937	3530.29		21.752	8.59119	38.9498	24.6485	1987.75
	9.35033	4.946	37.8507	25.2078	565.785		12.4822	5.10262	31.1971	23.5083	1149.21		15.012	9.24561	46.7584	40.2133	1557.89		18.2972	4.5411	36.8936	25.97	1374.7
	16.935	2.82177	41.8797	13.4089	655.933		18.352	3.22098	30.3734	12.119	837.202		23.3336	10.4921	68.5109	37.1212	2082.64		9.53348	3.58058	24.0704	15.6747	554.503
	21.7736	10.4761	53.6605	31.2908	1480.45		14.7881	11.707	25.7337	29.1234	2144.2		20.5558	12.3553	63.3774	44.9669	4252.35		22.7497	10.8449	30.5185	33.1548	4096.43
	24.6595	3.06163	71.082	23.8172	1237.44		21.7963	3.7088	48.7356	18.8867	1236.16		27.5837	8.24506	102.923	46.9157	3437.77		25.9973	6.30075	46.7374	20.8638	2226.7
	11.8097	3.66923	25.4325	12.0806	653.229		15.2745	2.78841	23.704	10.4019	576.139		18.2649	5.95639	52.3774	29.9329	1624.2		10.7978	3.80021	22.7464	16.2199	605.86
	22.0834	4.45171	50.6751	24.5662	1625.35		14.4604	4.6333	27.3152	12.2298	466.519		22.6639	5.29161	60.5769	28.1373	1957.54		23.2456	6.14779	38.8966	21.2677	1525.33

## Sheet: PFC activation
	Close-larger							Close-small							Far-larger							Far-small
	Right DLPFC	Left DLPFC	Right DMPFC	Left DMPFC	Right VLPFC	Left VLPFC		Right DLPFC	Left DLPFC	Right DMPFC	Left DMPFC	Right VLPFC	Left VLPFC		Right DLPFC	Left DLPFC	Right DMPFC	Left DMPFC	Right VLPFC	Left VLPFC		Right DLPFC	Left DLPFC	Right DMPFC	Left DMPFC	Right VLPFC	Left VLPFC
Older	0.501435	0.470478	0.459966	0.346583	0.445891	0.160456		0.243212	0.148159	0.260766	0.213819	0.727657	0.73645		2.00641	1.19107	1.88748	1.28549	1.67507	1.61536		0.8014	0.5692	0.722063	1.17483	1.28113	0.457527
	0.0466926	-0.0904194	-0.125056	-0.0650976	0.116906	-0.209705		0.136315	-0.184383	-0.207708	-0.0317709	-0.220116	0.014665		0.170555	0.139906	0.0392111	0.223076	0.192076	-0.0758368		0.269653	0.067908	0.293841	0.164994	0.222318	0.31161
	0.736011	0.488151	0.469964	0.421095	0.762428	0.404479		0.235672	0.331838	0.373865	0.267336	0.474194	0.155223		0.395488	0.166924	0.344197	0.264033	0.411146	0.253284		0.448423	0.0590586	0.527633	0.262516	0.905534	0.901256
	0.0516647	0.24007	0.116585	0.0959314	0.0765462	0.386853		0.903847	0.622276	0.905751	0.679353	1.1521	0.224765		0.280617	0.21615	0.276268	0.18043	0.406084	0.327799		0.856665	0.202042	0.762537	1.07565	0.852356	1.02366
	0.113615	0.0825659	0.117438	0.138184	0.0471464	0.294076		0.321255	0.421603	0.380747	0.55301	0.581938	0.699698		1.22065	0.781977	1.0478	0.897823	1.26833	1.58315		0.419304	0.397313	0.463498	0.662164	0.719928	1.315
	0.529775	0.472969	0.652928	0.211479	0.679222	1.03364		1.25016	0.995885	1.01206	0.536288	0.78549	0.650933		1.24987	2.14645	1.66508	1.9434	2.39469	1.77804		1.10862	1.18457	1.01336	1.03948	0.6593	1.27311
	0.134498	0.276077	0.113153	0.255511	0.103707	0.194454		0.406718	0.29511	0.242981	0.176898	0.691558	0.9103		0.139219	0.306116	0.225684	0.269763	0.523505	0.680974		0.588727	0.461861	0.626138	0.404117	0.895188	1.02714
	0.541545	0.582616	0.449925	0.407498	0.660755	0.178813		0.450005	0.271818	0.289055	0.282378	0.278643	0.436016		0.87207	0.694544	0.503034	0.472097	1.27406	0.225232		0.4515	0.465	0.26746	0.4222	0.41	0.5195
	0.181935	0.32228	0.121172	0.170877	0.453249	0.2809		0.458594	0.456996	0.286436	0.156846	0.842856	0.526647		0.445628	0.275092	0.284811	0.186333	0.275861	0.618987		0.362125	0.26275	0.3006	0.2875	0.4275	0.29
	0.344423	0.413676	0.174275	0.396509	0.666763	0.536412		0.901926	0.941643	0.665286	1.08341	1.17944	1.55295		0.145065	0.321993	0.136666	0.174986	0.483973	0.658207		1.05974	1.36285	0.960612	1.32018	1.73031	2.11878
	0.330459	0.227758	0.198419	0.208842	0.23532	0.222651		0.677838	0.513748	0.61058	0.581658	0.751832	0.523114		0.433993	0.38238	0.408594	0.301489	0.485498	0.242919		0.348917	0.240305	0.221439	0.268199	0.793095	0.528447
	0.0945305	0.074007	0.0969973	0.0874135	0.138067	0.187903		0.581949	0.507708	0.549929	0.629447	1.07588	0.638203		0.365258	0.547525	0.488751	0.505025	0.721488	0.510512		0.849374	1.05616	0.740626	1.17015	1.67519	1.69349
	-0.0341185	0.219894	0.0370254	0.168347	0.0985892	0.320833		0.596798	0.894005	0.608211	0.708823	0.585954	1.09277		0.234465	0.467392	0.252797	0.333161	0.330864	0.414452		0.0313555	0.339022	0.422194	0.968573	0.795836	1.31383
	0.129169	0.0147646	0.0815271	-0.0567602	0.00873975	-0.0237605		-0.0413427	0.0915646	0.0301506	-0.0500255	-0.204951	-0.095208		0.210704	0.30043	0.168389	0.0752427	0.375711	-0.0576991		0.372519	0.170985	0.809198	0.624893	1.2373	1.08543
	0.455951	0.43761	0.643189	0.55707	0.69189	0.644834		0.539685	0.374653	0.350236	0.459575	0.998217	0.880287		-0.196498	0.0355	-0.00546386	0.102622	0.0828272	0.445902		0.121704	0.166521	0.0280837	0.322149	0.037215	0.60213
Middle	0.593501	0.202937	0.477842	0.529124	1.11294	0.427963		1.9894	1.81052	2.12736	2.08426	3.3062	2.03652		0.0750505	-0.0197913	0.174548	0.167832	-0.0939738	0.0937409		0.40745	0.0968802	0.123601	0.0400448	0.490874	0.353548
	0.429821	0.24945	0.546058	0.360957	0.805944	0.554739		0.163081	0.312219	0.0915653	0.225184	0.337396	0.114928		0.105444	-0.0332815	0.192368	0.055545	0.074363	-0.0459004		0.600817	0.42694	0.713593	0.903105	1.17087	0.891024
	-0.138594	-0.0515051	-0.162029	-0.141825	0.226952	0.0639126		0.0702238	0.133072	0.227575	0.394279	0.541732	0.522502		-0.203077	-0.407738	-0.141341	-0.313416	-0.307428	-0.236477		0.931995	0.710474	0.870092	0.794202	1.75483	1.52303
	0.158191	0.251531	0.202443	0.109656	0.447617	0.381638		-0.148351	0.0154438	-0.474608	-0.116714	-0.623065	0.274933		0.252785	0.0799964	0.0843742	0.0382901	0.386456	0.136468		0.293758	0.0476232	0.245731	-0.0845058	0.40184	0.0746604
	0.285414	0.221078	0.126197	0.211243	0.361629	0.14357		0.572216	0.712828	0.443096	0.334005	1.03049	0.55367		0.0818382	0.0917972	0.0485207	0.114857	0.177878	0.235543		0.59277	0.0227734	0.545473	0.131762	0.759511	0.278341
	0.133671	0.104313	0.0962918	-0.0255172	0.0856551	0.172366		0.102938	0.0701451	0.224155	0.101885	0.258958	0.355138		0.0831075	0.149708	0.114793	-0.0235974	-0.0383871	0.077745		0.0401901	0.175831	0.373831	0.307428	0.508722	0.369824
	0.45869	0.253747	0.328863	0.2634	0.286907	0.0175117		0.0390439	0.0989885	-0.118698	0.200549	-0.0810516	0.145998		0.263931	0.159018	0.131587	0.123885	0.554789	0.342624		0.54366	0.21262	0.198454	0.204386	0.538036	0.408497
	0.0596705	0.0896061	-0.0659539	0.0664882	0.592343	0.122582		0.93587	0.816441	0.448789	0.772056	1.29079	0.901565		0.427784	0.272949	0.117939	0.420896	0.59102	0.508565		1.10526	0.75098	1.06248	1.06692	1.77011	1.78641
	0.0139641	0.115623	0.101972	0.117076	0.0968658	-0.01826		0.184337	0.125282	0.361883	0.276817	0.43316	0.483483		0.844521	0.817768	1.08422	0.743364	1.07257	0.793772		0.391422	0.294161	0.538174	-0.0177965	0.397212	0.216474
	-0.0078377	-0.00630212	0.0472411	-0.0482941	0.0346546	0.140111		-0.0756693	0.0375655	-0.152253	0.0725301	-0.0568738	0.195716		0.91759	0.993864	1.04641	1.16912	1.48166	1.27777		0.687274	0.252989	0.652979	0.682475	0.854965	0.930761
	0.0185117	-0.0373261	0.0235358	-0.0147852	-0.080079	-0.018493		0.351264	0.15284	0.249776	0.0558424	0.112536	0.0407225		-0.115156	-0.19725	-0.0529445	-0.154607	0.0284722	-0.217429		0.69816	0.520198	0.814486	0.760184	1.49817	1.25948
	0.214427	0.0684424	0.0593482	0.150065	0.257165	0.126432		1.12379	0.262943	0.595036	0.409824	0.995489	0.375062		0.257423	-0.217408	-0.0196897	-0.0278395	-0.039767	-0.0847415		0.490738	0.265478	0.220521	0.368805	0.409198	0.245034
	-0.0784412	-0.27405	-0.190066	-0.10702	-0.0184555	-0.170962		-0.0756288	-0.190691	-0.133138	0.18622	-0.356682	-0.182485		0.409076	0.203762	0.184077	0.747484	1.37193	0.88735		0.00227416	-0.0262674	0.0138224	0.598871	0.311824	0.649782
	0.189939	0.09399	0.134964	0.0929	0.271602	0.189759		-0.388691	-0.403635	-0.209076	-0.388861	-0.281563	-0.414094		-0.0103114	-0.0561593	0.0782682	0.0387134	0.298493	0.156808		0.19866	-0.352327	0.0548128	-0.131038	-0.229366	-0.370938
	-0.107231	-0.053048	-0.183727	-0.0428635	-0.112567	0.0363737		0.0991601	0.0276316	0.10005	0.153563	0.0731508	0.100822		0.0511053	0.0364779	0.157904	0.154927	0.0718858	0.0992795		0.404985	0.361634	0.705446	0.62784	0.629399	0.637574
Young	-0.131104	-0.0501844	-0.00594578	-0.0248618	0.0261514	-0.0510115		0.053387	0.0859972	0.110858	0.164464	0.117317	0.256632		0.0808505	0.100841	0.0495343	0.123712	0.39357	0.330778		0.0101353	0.0237284	-0.112809	-0.0634929	0.205865	0.051437
	0.384201	0.416521	0.0266494	0.285905	0.397511	0.460903		-0.0985278	-0.239689	-0.054356	-0.281177	-0.159184	-0.146116		0.343696	0.161488	0.292409	0.157233	0.231159	-0.0165443		0.30014	-0.158864	0.313423	-0.311817	0.701162	0.141845
	0.080009	0.13745	-0.174606	0.0654423	-0.286264	-0.062114		-0.176335	-0.188368	-0.0687175	-0.101954	-0.109291	-0.184382		0.325878	0.134488	0.167703	-0.0127235	0.45756	0.157819		0.0920931	-0.00882772	0.0651207	-0.0603676	0.278078	0.285298
	0.00032256	0.02341	0.0405071	0.0627769	-0.54361	-0.02695		0.104075	-0.163953	-0.0664554	-0.247925	0.0473335	-0.131545		0.639002	0.0738378	0.257352	0.010065	0.192923	-0.005958		0.66354	0.466049	0.535156	0.54527	0.901935	1.09032
	0.0263713	0.0638059	-0.0398629	-0.157374	0.163913	-0.0608481		0.520901	0.0764201	0.424606	-0.0977699	0.588538	0.100435		0.00231322	0.208823	0.0902511	-0.353221	0.208071	0.0190125		0.603744	0.475925	0.432468	0.319323	0.512756	0.383528
	0.223391	-0.0687212	0.211559	-0.256315	0.289424	-0.0777105		0.233145	-0.00301306	0.492275	-0.175872	0.498053	0.128957		-0.105723	-0.185588	0.207555	-0.114573	0.45585	0.264858		0.25321	0.0933612	0.317097	0.00903038	0.494077	0.25712
	0.0819904	0.40971	0.223231	0.47615	0.493263	0.415055		0.181737	0.0391134	0.207321	-0.12039	0.505397	-0.247403		0.310617	0.171249	0.218181	0.0448036	0.687724	0.078206		0.721216	0.295812	0.849227	0.691643	2.19013	1.3287
	-0.257752	-0.477364	-0.244107	-0.44146	-0.166413	-0.307693		0.135884	0.234017	0.405175	0.409246	0.347288	0.473791		-0.46642	-0.356659	-0.110301	-0.334468	-0.847318	0.423716		0.732766	0.265173	0.760543	0.36546	0.78915	0.978556
	0.139306	0.0775027	-0.120593	0.239951	-0.114354	0.0851323		-0.154386	0.336274	0.112384	-0.867882	-0.309854	-0.162839		0.688994	0.431966	0.645453	-0.279101	0.350799	-1.68301		-0.205703	0.010879	-0.864103	-0.476613	-0.639401	-0.391853
	-0.287743	-0.393665	-0.475212	-0.391994	-0.406773	-0.766145		0.315536	0.188834	0.288976	0.188037	0.583014	0.188762		-0.172611	-0.205395	-0.224888	-0.255882	-0.311236	-0.198079		0.662136	0.515077	0.491435	0.459282	1.09008	1.15104
	0.201035	0.169277	0.236773	0.246736	0.385677	0.439663		-0.0978046	-0.0220419	0.0184315	-0.0876662	0.236983	0.230334		0.125129	0.234761	0.189163	0.0660699	0.403292	0.375251		0.0109386	0.0591841	0.0487886	-0.0338252	0.0728548	0.0630303
	0.0758949	0.159282	0.15265	0.24833	0.51081	0.378601		0.0569184	-0.00485967	0.0447604	-0.00981944	-0.214549	-0.151091		-0.674824	-0.431686	-0.638043	-0.884241	-0.774942	-1.13493		0.157946	-0.267323	0.285249	-0.321273	0.782452	-0.793363
	0.0389577	0.0103227	-0.0354548	0.0029036	-0.026345	0.0501031		0.187535	0.0818577	0.208436	0.157418	0.27939	0.197789		0.569669	0.456389	0.436508	0.330754	0.349296	0.250825		1.34996	0.888454	0.975606	1.08695	0.992702	0.865962
	0.128653	0.0888162	0.0899154	0.0443436	0.101443	-0.0771609		0.013934	0.00208663	-0.0713923	-0.0605146	-0.031112	0.0162143		-0.0511392	-0.129679	-0.351984	-0.048909	-0.130135	-0.66252		-0.0786007	-0.020523	-0.0829183	-0.06428	-0.0182	-0.0464869
	-0.0624975	-0.0320883	-0.0549517	-0.0196662	-0.0977709	-0.0554065		0.262084	0.295964	0.251146	0.286453	0.500243	0.455141		0.441438	0.253485	0.544003	0.564034	0.986454	0.741745		-0.024872	-0.0265911	0.0063862	-0.00026356	0.190693	0.13079
